# Supplementary material
Source: ML conference proceedings conference paper supplement (https://openaccess.thecvf.com/content/ICCV2025/html/Kobayashi_Temperature_in_Cosine-based_ICCV_2025_paper.html)
Supplement: Supplementary file 1 [file Kobayashi_Temperature_in_Cosine-based_ICCV_2025_supplemental.pdf]

# Temperature in Cosine-based Softmax Loss

## Supplementary Material

### 5. Softmax Representation

Softmax is derived from the optimization of

$$\min_{\alpha} \frac{1}{\kappa} \sum_{c=1}^C \alpha_c \log \alpha_c - \sum_{c=1}^C \alpha_c z_c, \quad (16)$$

$$s.t. \sum_{c=1}^C \alpha_c = 1, \quad (17)$$

$$\alpha_c \geq 0 \forall c \in \{1, \dots, C\}, \quad (18)$$

as follows.

By introducing Lagrange multipliers  $\lambda$  and  $\{\beta_c\}_{c=1}^C$  for the constraints (17, 18), the above optimization leads to

$$L = \frac{1}{\kappa} \sum_c \alpha_c \log \alpha_c - \sum_c \alpha_c z_c + \lambda \left( \sum_c \alpha_c - 1 \right) - \sum_c \beta_c \alpha_c, \quad (19)$$

which produces the following derivatives and KKT conditions;

$$\frac{\partial L}{\partial \alpha_c} = \frac{1}{\kappa} (\log \alpha_c + 1) - z_c + \lambda - \beta_c = 0, \quad (20)$$

$$\frac{\partial L}{\partial \lambda} = \sum_c \alpha_c - 1 = 0, \quad (21)$$

$$\text{KKT: } \alpha_c \geq 0, \beta_c \geq 0, \beta_c \alpha_c = 0, \forall c. \quad (22)$$

From (20), we can derive

$$\alpha_c = \exp(\kappa(z_c - \lambda + \beta_c) - 1) > 0, \quad (23)$$

which is also accompanied by  $\beta_c = 0$  in (22). On the other hand,  $\lambda$  can be determined so that (21) holds, finally resulting in the optimizer of softmax representation as

$$\alpha_c = \frac{\exp(\kappa z_c)}{\sum_k \exp(\kappa z_k)}. \quad (24)$$

#### 5.1. Connection to Least-square approach

As shown in (8), the least-square representation is written in

$$\min_{\alpha \in \Omega} \frac{1}{2} \alpha^\top \tilde{W}^\top \tilde{W} \alpha - \sum_c \alpha_c z_c. \quad (25)$$

In the case that the classifiers are less correlated, implying  $\tilde{W}^\top \tilde{W} \approx \mathbf{I}$  (identity matrix) such as after sufficient training, (25) is further reduced to

$$\min_{\alpha \in \Omega} \frac{1}{2} \sum_c \alpha_c^2 - \sum_c \alpha_c z_c. \quad (26)$$

Compared to (16), only difference is found in the first term which injects regularization about sparsity; that is, negative entropy and  $L_2$ -norm are introduced for (moderately) smoothing the coefficients  $\alpha$  in the minimization of (16) and (26), respectively. This analogy is a theoretical motivation to regard the softmax representation (9) as an (approximated)  $\kappa$ -parameterized optimizer for the least-square problem (25).

### 6. Analysis about $\kappa$

#### 6.1. Characteristics

As the least-square formulation (8) is equivalent to one-class SVM [47], it produces *sparse* coefficients  $\alpha$  which contain a few numbers of non-zero elements corresponding to support vectors. It accordingly demands the softmax (9) to be also sparse as an approximation of  $\alpha$  (Section 5).

When the feature vector  $\tilde{x}$  is apart from the classifiers especially at an early stage of training, the logits are quite small; we can empirically observe that  $\max_c |z_c| = \epsilon \ll 1$  for the immature features. For ease of discussion, suppose that we have  $m$ -prominent logits of  $z_{c^*} = \epsilon$  and the other logits are zeros. As describe above, it is necessary to convert the less discriminative logits to  $m$ -sparse softmax of

$$p(z) = \left[ \underbrace{\frac{1-\eta}{m}, \dots, \frac{1-\eta}{m}}_m, \underbrace{\frac{\eta}{C-m}, \dots, \frac{\eta}{C-m}}_{C-m} \right], \quad (27)$$

with small fraction  $\eta \ll 1$ . It is achieved by setting  $\kappa$  as

$$p(z_{c^*}) = \frac{1-\eta}{m} = \frac{\exp(\kappa \epsilon)}{m \exp(\kappa \epsilon) + (C-m)} \quad (28)$$

$$\Rightarrow \kappa = \frac{1}{\epsilon} \left[ \log \frac{1-\eta}{\eta} + \log \frac{C-m}{m} \right] \gg 1. \quad (29)$$

Thus, as shown in Figure 1, the LS-optimized  $\kappa^*$  is larger for immature features at early training epochs; Figure 5 demonstrates an empirical case for the feature at the 1st epoch which renders  $\kappa^* = 102$  in our LS method. Then, as the training proceeds, the feature vector  $\tilde{x}$  approaches the classifier  $\tilde{w}_y$ , producing discriminative logits with an enlarged  $\epsilon$  to reduce  $\kappa$  in constructing sparse softmax.

#### 6.2. Number of classes

Our method adaptively copes with various number of classes,  $C$ . Figure 6 summarizes the optimized  $\kappa^*$  over various  $C$  on diverse datasets. It is noteworthy that our method optimizes  $\kappa$  based on a feature representation and the number of classifiers ( $C$ ), and generally speaking, the

Table 8. Training parameters.

|               | Table 2      |                   | Table 4b                         | Table 5 | Table 6              | Table 7                                                                                                                        |
|---------------|--------------|-------------------|----------------------------------|---------|----------------------|--------------------------------------------------------------------------------------------------------------------------------|
|               | Cifar-10/100 | Food-101/ImageNet | Fine-tuning                      | Cosify  | MS1M-RetinaFace      | ImageNet-LT/iNat2018/Places-LT                                                                                                 |
| Epochs        | 240          | 100               | 60                               | 30      | 25                   | 100 (1st) / 30 (2nd)                                                                                                           |
| Learning rate | 0.1          | 0.1               | $0.1(\mathbf{W}), 0.001(\Theta)$ | 0.01    | 0.2                  | 0.2                                                                                                                            |
| schedule      | cosine       | cosine            | cosine                           | cosine  | polynomial ( $p=2$ ) | cosine                                                                                                                         |
| Weight decay  | 0.0005       | 0.0001            | 0.0001                           | 0.0001  | 0.0005               | 0.0001                                                                                                                         |
| Batch size    | 128          | 256               | 128                              | 256     | 512                  | 256 $\left( \begin{array}{l} \text{Random (1st)} \\ \text{Class-balanced (2nd)} \end{array} \right.$ sampling $\left. \right)$ |

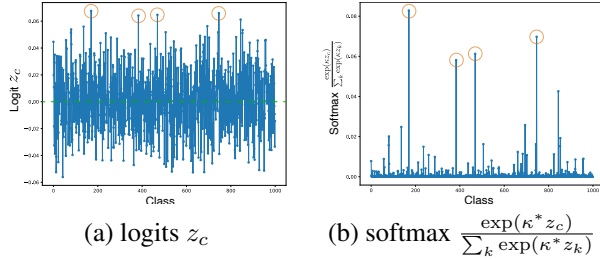

Figure 5. An example of an immature feature  $\hat{x}$  by ResNet-50 at the 1st epoch on ImageNet training. The logits  $z_c = \hat{w}_c^T \hat{x}$  are shown in (a) and are converted to softmax in (b) with the LS-optimized  $\kappa^* = 102$ . The points of higher logit scores, indicated by circles, win the sparse softmax weights via the larger  $\kappa^*$ .

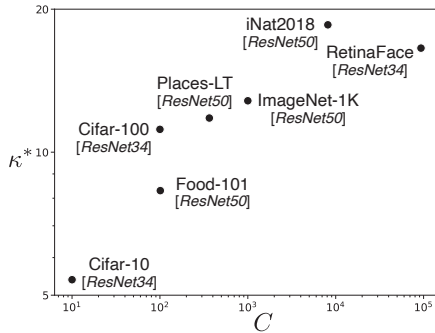

Figure 6. Relationship between the number of class ( $C$ ) and the optimized  $\kappa^*$ .

larger number ( $C$ ) of classifiers well describe an input feature in **(10)**, enlarging  $\kappa^*$ .

### 6.3. Candidate values

In Section 2.3, we provide a candidate set over which the optimal  $\kappa$  is searched in a simple greedy manner. In this work, the set is simply composed of 20 values equally-log-spaced in  $[e^{-2}, e^5]$  as

$$\kappa_j = \exp \left\{ -2 + \frac{5 - (-2)}{19} j \right\}, j \in \{0, \dots, 19\}, \quad (30)$$

or practically written in PyTorch style by

$$\text{torch.exp(torch.linspace(-2, 5, 20))}. \quad (31)$$

## 7. Training procedure

Deep models are trained by SGD optimizer with 0.9 momentum and the training parameters shown in Table 8; in linear-probe transfer learning (Table 4a), we apply L-BFGS optimizer to train a classifier for frozen features.

## 8. Additional results

## 8.1. Deep models

We additionally apply deep models of DenseNet [46], ResNeXt [49] and MobileNet-v2 [48] to ImageNet training, and report performance results in Table 9 which are measured in the same manner as Table 2; while DenseNet and ResNeXt are trained in the procedure of Table 8, the training parameters for MobileNet-v2 are slightly modified in weight decay of 0.00004 and learning rate of 0.045 which is exponentially decayed. So pre-trained models are then applied to the tasks regarding model confidence (Section 3.2.1, Figure 4) and transfer learning (Section 3.2.2, Table 4); the results are shown in Tables 12, 13 & 14. Similarly to Section 3.2.1 & 3.2.2, we can observe that (1) the optimized  $\kappa^*$  works as a lower bound, (2) the middle  $\kappa = 2\kappa^*$  roughly maximizes performance on ImageNet, (3) the smaller  $\kappa \approx \kappa^*$  renders high robustness against less-confident samples, and (4) the larger  $\kappa$  exhibits favorable generalization performance on transfer learning.

## 8.2. “Cosify”

Table 10 shows performance of ResNet-50 *cosified* with our LS-optimized  $\kappa^*$ . In the *cosification* (via fine-tuning), the LS method robustly produces the same  $\kappa^*$ . Besides, the performances of transfer learning by all the *cosified* models are detailed in Table 15. The same discussion/analysis as in Section 3.2.2 can hold for these results.

### 8.3. Computation time

Our LS method is composed of two processes, computing reconstruction  $\mathcal{E}_\kappa^{LS}$  in (10) and searching minimum over  $\kappa$

Table 9. Image classification accuracy (%) by various models on ImageNet ( $C = 1000$ ). These results augment Table 2.

| Model                | DenseNet161 [46] | ResNeXt-50 [49] | MobileNet-v2 [48] |
|----------------------|------------------|-----------------|-------------------|
| $d$                  | 2208             | 2048            | 1280              |
| softmax              | 78.97            | 78.20           | 68.69             |
| LS (11)              | 78.65            | 78.46           | 66.04             |
| ( $\kappa^*$ )       | (12.50)          | (12.57)         | (14.49)           |
| Fix $\kappa = 10$    | 78.42            | 78.34           | 65.23             |
| $\kappa = 20$        | 78.81            | 78.29           | 67.63             |
| $\kappa = 30$        | 78.89            | 78.20           | 68.94             |
| $\kappa = 40$        | 78.76            | 78.02           | 69.41             |
| $\kappa = 50$        | 78.61            | 77.87           | 69.49             |
| $\kappa = 60$        | 78.08            | 77.38           | 69.32             |
| $\kappa = 2\kappa^*$ | 78.75            | 78.28           | 68.96             |

Table 10. Performance of *cosified* ResNet50 with LS-optimized  $\kappa^*$ . These scores are measured in the ways of Table 2 and Figure 4.

|                 |   |       |          | Specialization |        |            |                    |
|-----------------|---|-------|----------|----------------|--------|------------|--------------------|
| finetune blocks |   | LS    | ImageNet | AP for MISS    |        | AP for OOD |                    |
| 1               | 2 | 3     | 4        | $\kappa^*$     | Acc.   | $Z_{max}$  | $\ \mathbf{x}\ _2$ |
| from scratch    |   | 12.83 | 77.27    | 0.9400         | 0.9011 | 0.9016     | 0.8428             |
| ✓               | ✓ | ✓     | ✓        | 12.79          | 77.19  | 0.9413     | 0.9062             |
| -               | ✓ | ✓     | ✓        | 12.77          | 77.09  | 0.9420     | 0.9063             |
| -               | - | ✓     | ✓        | 12.77          | 77.10  | 0.9415     | 0.9066             |
| -               | - | -     | ✓        | 12.78          | 76.84  | 0.9410     | 0.9060             |

Table 11. Computation time (msec) to process a mini-batch and optimize  $\kappa$  by LS.

|         | whole      | Optimizing $\kappa$       |                    |
|---------|------------|---------------------------|--------------------|
|         | mini-batch | $\mathcal{E}_\kappa^{LS}$ | $\arg \min_\kappa$ |
| Food101 | 304        | 0.13                      | 0.015              |
| Cifar10 | 33.8       | 0.118                     | 0.013              |

candidates  $\arg \min_{\kappa \in \mathcal{K}}$  in (14). Table 11 shows computation time of those processes in comparison to a mini-batch computation, demonstrating that they are performed in a negligible computation cost.

## References

- [46] Gao Huang, Zhuang Liu, Laurens van der Maaten, and Kilian Q. Weinberger. Densely connected convolutional networks. In *CVPR*, pages 2261–2269, 2017. 2, 3, 4
- [47] Takumi Kobayashi. Three viewpoints toward exemplar svm. In *CVPR*, pages 2765–2773, 2015. 1
- [48] Mark Sandler, Andrew Howard, Menglong Zhu, Andrey Zhmoginov, and Liang-Chieh Chen. Mobilenetv2: Inverted residuals and linear bottlenecks. In *CVPR*, pages 4510–4520, 2018. 2, 3, 5

- [49] Saining Xie, Ross Girshick, Piotr Dollár, Zhuowen Tu, and Kaiming He. Aggregated residual transformations for deep neural networks. In *CVPR*, pages 5987–5995, 2017. 2, 3, 4

Table 12. Performance results of DenseNet161 [46] pretrained on ImageNet, for detecting miss-classified (MISS) and out-of-distribution (OOD) samples in (a,b) (see Section 3.2.1) and transfer learning in (c) (see Section 3.2.2).

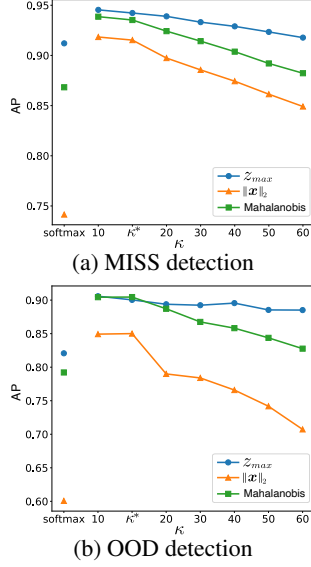

| (c) Classification accuracy (%) by transfer learning |         |          |         |              |         |       |            |
|------------------------------------------------------|---------|----------|---------|--------------|---------|-------|------------|
| Dataset                                              | CUB-200 | Food-101 | Car-196 | Aircraft-100 | SUN-397 | DTD   | Flower-102 |
| <i>Linear probe</i>                                  |         |          |         |              |         |       |            |
| softmax                                              | 74.91   | 74.62    | 58.97   | 50.86        | 61.97   | 74.36 | 90.75      |
| Fixed $\kappa = 10$                                  | 33.98   | 40.80    | 16.52   | 12.57        | 41.42   | 58.24 | 39.70      |
| 20                                                   | 57.01   | 63.77    | 39.58   | 40.02        | 54.90   | 67.98 | 77.56      |
| 30                                                   | 70.09   | 71.14    | 55.29   | 50.71        | 59.22   | 73.24 | 88.00      |
| 40                                                   | 75.68   | 74.32    | 61.87   | 55.69        | 61.23   | 74.36 | 91.97      |
| 50                                                   | 76.42   | 75.12    | 64.30   | 58.54        | 61.58   | 74.95 | 92.13      |
| 60                                                   | 78.93   | 75.62    | 66.15   | 59.59        | 61.58   | 74.47 | 93.48      |
| <i>Fine-tuning</i>                                   |         |          |         |              |         |       |            |
| softmax                                              | 80.87   | 87.52    | 86.62   | 77.40        | 63.08   | 75.48 | 95.84      |
| Fixed $\kappa = 10$                                  | 79.76   | 86.42    | 85.72   | 78.60        | 61.88   | 74.63 | 91.99      |
| 20                                                   | 81.97   | 87.67    | 86.72   | 80.19        | 63.34   | 76.60 | 93.92      |
| 30                                                   | 83.13   | 87.74    | 87.71   | 80.88        | 64.44   | 78.09 | 95.56      |
| 40                                                   | 84.13   | 87.74    | 88.29   | 81.77        | 64.52   | 76.91 | 96.47      |
| 50                                                   | 83.78   | 87.82    | 88.51   | 80.31        | 65.03   | 78.03 | 96.67      |
| 60                                                   | 83.30   | 87.86    | 88.72   | 81.26        | 64.96   | 78.09 | 96.96      |

Table 13. Performance results of ResNeXt-50 [49] pretrained on ImageNet, for detecting miss-classified (MISS) and out-of-distribution (OOD) samples in (a,b) (see Section 3.2.1) and transfer learning in (c) (see Section 3.2.2).

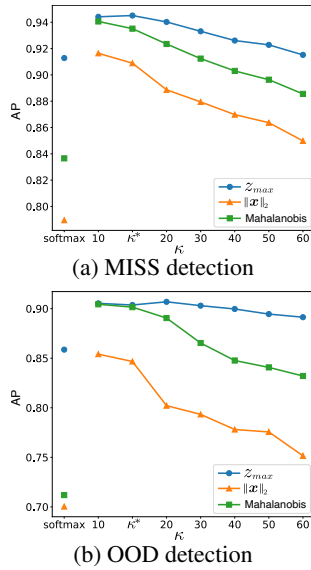

| (c) Classification accuracy (%) by transfer learning |         |          |         |              |         |       |            |
|------------------------------------------------------|---------|----------|---------|--------------|---------|-------|------------|
| Dataset                                              | CUB-200 | Food-101 | Car-196 | Aircraft-100 | SUN-397 | DTD   | Flower-102 |
| <i>Linear probe</i>                                  |         |          |         |              |         |       |            |
| softmax                                              | 69.61   | 69.40    | 49.43   | 42.93        | 59.78   | 72.98 | 88.26      |
| Fixed $\kappa = 10$                                  | 44.41   | 45.73    | 20.63   | 16.89        | 43.26   | 57.29 | 48.93      |
| 20                                                   | 63.51   | 64.79    | 43.95   | 41.40        | 54.57   | 69.52 | 79.80      |
| 30                                                   | 69.16   | 69.05    | 53.05   | 48.84        | 58.36   | 72.71 | 84.47      |
| 40                                                   | 68.43   | 69.49    | 53.86   | 55.09        | 58.87   | 72.55 | 88.78      |
| 50                                                   | 75.20   | 73.40    | 61.80   | 54.07        | 60.93   | 74.84 | 91.07      |
| 60                                                   | 75.98   | 74.34    | 63.55   | 58.48        | 61.06   | 73.83 | 91.25      |
| <i>Fine-tuning</i>                                   |         |          |         |              |         |       |            |
| softmax                                              | 80.64   | 86.62    | 86.23   | 77.04        | 62.87   | 74.84 | 94.91      |
| Fixed $\kappa = 10$                                  | 79.69   | 86.58    | 85.43   | 77.13        | 63.04   | 75.27 | 91.21      |
| 20                                                   | 81.26   | 87.22    | 86.70   | 77.67        | 63.68   | 75.64 | 93.11      |
| 30                                                   | 81.18   | 87.20    | 87.36   | 78.42        | 63.96   | 77.23 | 94.67      |
| 40                                                   | 77.24   | 86.98    | 86.77   | 79.41        | 64.29   | 76.86 | 95.32      |
| 50                                                   | 82.68   | 87.17    | 87.52   | 79.32        | 64.75   | 78.35 | 95.97      |
| 60                                                   | 82.21   | 87.30    | 87.47   | 79.14        | 64.34   | 77.87 | 96.52      |

Table 14. Performance results of MobileNet-v2 [48] pretrained on ImageNet, for detecting miss-classified (MISS) and out-of-distribution (OOD) samples in (a,b) (see Section 3.2.1) and transfer learning in (c) (see Section 3.2.2).

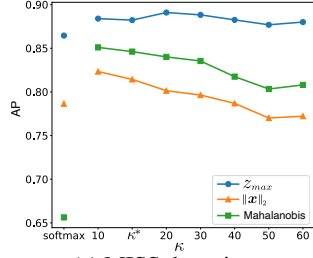

(a) MISS detection

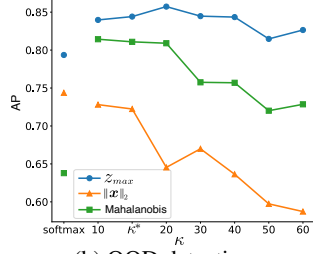

(b) OOD detection

(c) Classification accuracy (%) by transfer learning

|                     | Dataset | CUB-200 | Food-101 | Car-196 | Aircraft-100 | SUN-397 | DTD   | Flower-102 |
|---------------------|---------|---------|----------|---------|--------------|---------|-------|------------|
| <i>Linear probe</i> |         |         |          |         |              |         |       |            |
| softmax             |         | 68.16   | 67.45    | 48.85   | 48.54        | 55.60   | 70.16 | 89.67      |
| Fixed $\kappa = 10$ |         | 37.94   | 43.68    | 18.54   | 20.43        | 39.54   | 56.17 | 51.86      |
|                     | 20      | 57.01   | 59.81    | 32.86   | 38.07        | 49.84   | 65.80 | 76.35      |
|                     | 30      | 66.55   | 64.34    | 44.34   | 45.96        | 53.41   | 67.55 | 85.41      |
|                     | 40      | 68.76   | 67.34    | 49.67   | 48.42        | 54.87   | 68.40 | 87.95      |
|                     | 50      | 70.40   | 68.89    | 53.26   | 51.25        | 55.69   | 67.61 | 89.95      |
|                     | 60      | 70.28   | 69.37    | 54.50   | 52.42        | 55.52   | 69.95 | 90.10      |
| <i>Fine-tuning</i>  |         |         |          |         |              |         |       |            |
| softmax             |         | 74.59   | 83.27    | 78.95   | 71.10        | 58.89   | 71.81 | 93.60      |
| Fixed $\kappa = 10$ |         | 71.93   | 81.60    | 75.07   | 64.24        | 56.64   | 69.84 | 88.15      |
|                     | 20      | 74.24   | 82.88    | 78.39   | 67.99        | 58.09   | 72.18 | 91.68      |
|                     | 30      | 75.43   | 83.52    | 79.76   | 69.48        | 59.38   | 73.30 | 93.01      |
|                     | 40      | 75.97   | 83.51    | 79.75   | 69.45        | 59.55   | 73.14 | 94.13      |
|                     | 50      | 76.64   | 83.60    | 80.36   | 69.90        | 59.66   | 72.61 | 94.20      |
|                     | 60      | 76.79   | 83.26    | 79.89   | 69.12        | 59.81   | 73.46 | 94.54      |

Table 15. Classification accuracy (%) by transfer learning of *cosified* ResNet-50 with various  $\kappa$ .

|                     |                              | finetune blocks |   |   |   | CUB-200 | Food-101 | Car-196 | Aircraft-100 | SUN-397 | DTD   | Flower-102 |
|---------------------|------------------------------|-----------------|---|---|---|---------|----------|---------|--------------|---------|-------|------------|
|                     |                              | 1               | 2 | 3 | 4 |         |          |         |              |         |       |            |
| <i>Linear probe</i> | $\kappa = 10$ ; from scratch |                 |   |   |   | 47.13   | 48.23    | 23.44   | 22.29        | 44.69   | 59.15 | 55.47      |
|                     | ✓                            | ✓               | ✓ | ✓ |   | 51.28   | 54.77    | 30.17   | 27.90        | 47.37   | 62.55 | 65.31      |
|                     | -                            | ✓               | ✓ | ✓ |   | 50.79   | 54.72    | 30.52   | 29.46        | 47.01   | 62.13 | 63.82      |
|                     | -                            | -               | ✓ | ✓ |   | 51.04   | 54.78    | 29.03   | 29.04        | 47.16   | 61.70 | 63.65      |
|                     | -                            | -               | - | ✓ |   | 49.91   | 54.99    | 29.85   | 28.32        | 46.90   | 61.54 | 64.87      |
|                     | $\kappa = 60$ ; from scratch |                 |   |   |   | 75.63   | 74.04    | 61.86   | 57.16        | 61.14   | 74.10 | 92.19      |
|                     | ✓                            | ✓               | ✓ | ✓ |   | 71.52   | 71.09    | 52.88   | 48.45        | 60.11   | 75.64 | 89.80      |
|                     | -                            | ✓               | ✓ | ✓ |   | 71.49   | 71.07    | 52.38   | 48.57        | 60.25   | 75.27 | 89.77      |
|                     | -                            | -               | ✓ | ✓ |   | 71.54   | 70.58    | 52.46   | 47.94        | 59.93   | 74.15 | 89.14      |
|                     | -                            | -               | - | ✓ |   | 70.88   | 70.36    | 51.04   | 47.67        | 59.82   | 74.04 | 88.40      |
|                     | LS $\kappa^*$ ; from scratch |                 |   |   |   | 52.62   | 57.04    | 27.50   | 26.49        | 50.22   | 66.91 | 63.05      |
|                     | ✓                            | ✓               | ✓ | ✓ |   | 57.78   | 61.51    | 37.78   | 34.26        | 52.60   | 67.77 | 76.44      |
|                     | -                            | ✓               | ✓ | ✓ |   | 56.94   | 61.87    | 37.15   | 33.69        | 52.61   | 66.01 | 75.62      |
|                     | -                            | -               | ✓ | ✓ |   | 57.37   | 61.68    | 35.67   | 32.46        | 52.08   | 67.34 | 76.09      |
|                     | -                            | -               | - | ✓ |   | 56.71   | 61.22    | 37.26   | 32.85        | 51.91   | 67.77 | 75.36      |
| <i>Fine-tuning</i>  | $\kappa = 10$ ; from scratch |                 |   |   |   | 79.76   | 86.28    | 85.32   | 76.71        | 62.22   | 73.56 | 90.57      |
|                     | ✓                            | ✓               | ✓ | ✓ |   | 79.43   | 86.47    | 85.78   | 78.72        | 62.93   | 73.56 | 90.65      |
|                     | -                            | ✓               | ✓ | ✓ |   | 80.21   | 86.20    | 85.60   | 77.82        | 62.61   | 73.94 | 91.34      |
|                     | -                            | -               | ✓ | ✓ |   | 79.62   | 86.65    | 85.90   | 79.11        | 62.76   | 74.15 | 91.11      |
|                     | -                            | -               | - | ✓ |   | 79.54   | 86.39    | 85.68   | 79.08        | 63.14   | 74.57 | 90.91      |
|                     | $\kappa = 60$ ; from scratch |                 |   |   |   | 81.18   | 86.83    | 86.66   | 78.12        | 63.80   | 76.49 | 96.36      |
|                     | ✓                            | ✓               | ✓ | ✓ |   | 82.13   | 86.69    | 87.18   | 78.63        | 63.15   | 76.86 | 95.16      |
|                     | -                            | ✓               | ✓ | ✓ |   | 82.59   | 86.82    | 87.07   | 78.96        | 63.18   | 76.70 | 94.93      |
|                     | -                            | -               | ✓ | ✓ |   | 82.66   | 86.79    | 86.88   | 79.23        | 63.37   | 76.86 | 95.01      |
|                     | -                            | -               | - | ✓ |   | 82.59   | 86.74    | 87.00   | 79.26        | 63.28   | 76.91 | 95.20      |
|                     | LS $\kappa^*$ ; from scratch |                 |   |   |   | 78.86   | 86.14    | 84.22   | 75.33        | 62.78   | 74.52 | 90.57      |
|                     | ✓                            | ✓               | ✓ | ✓ |   | 79.71   | 86.56    | 84.71   | 77.79        | 62.93   | 75.59 | 92.08      |
|                     | -                            | ✓               | ✓ | ✓ |   | 80.23   | 86.45    | 85.13   | 77.67        | 63.07   | 74.68 | 92.47      |
|                     | -                            | -               | ✓ | ✓ |   | 79.81   | 86.23    | 85.06   | 77.49        | 62.67   | 74.89 | 92.20      |
|                     | -                            | -               | - | ✓ |   | 79.92   | 86.36    | 85.72   | 78.84        | 62.82   | 74.47 | 91.86      |
